# Supplementary material for: Activation of carbon fiber for enhancing electrochemical performance
Source: Royal Society of Chemistry journal article supplement (doi:10.1039/c9qi01028a), 2019-01-01
Supplement: c9qi01028a1.pdf [file c9qi01028a1.pdf]

## Activation of carbon fiber for enhancing electrochemical performance

Chaohui Ruan, Pengxi Li, Jing Xu, Yucheng Chen, Yibing Xie\*

School of Chemistry and Chemical Engineering, Southeast University, Nanjing

211189, China

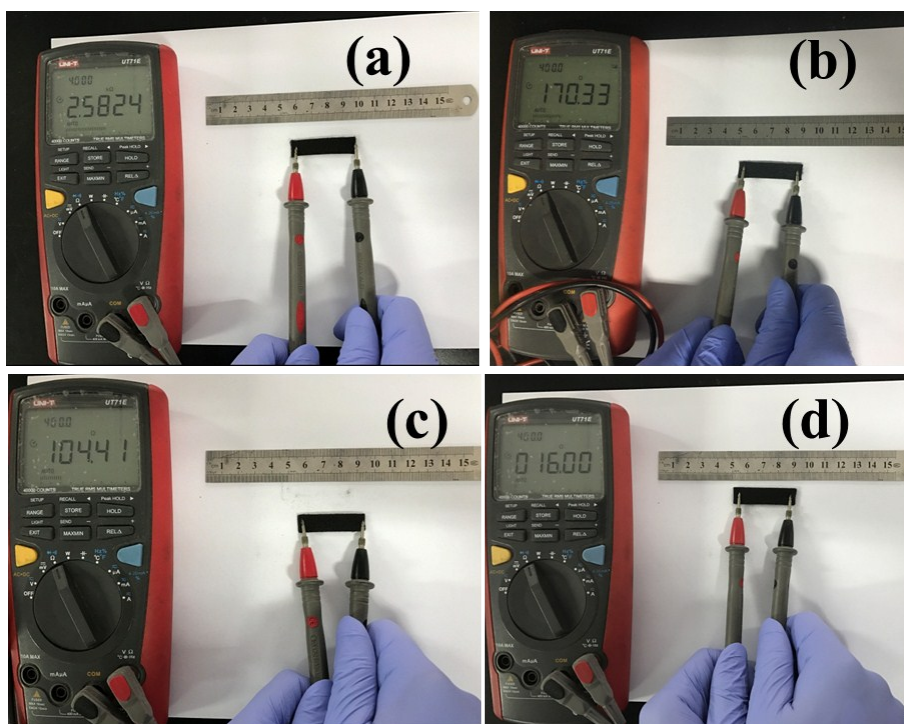

**Figure S1** Photograph illustrating the ohm resistance of: (A) CF; (B) CF-800; (C) CF-900; (D) TCF.

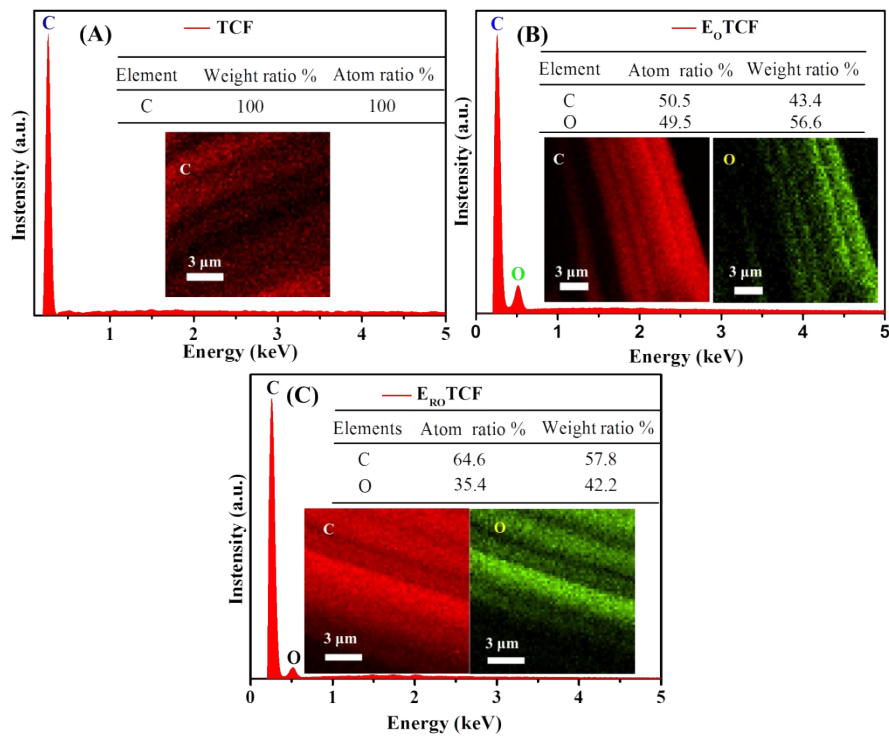

**Figure S2** EDS patterns of (A) TCF, (B) E<sub>0</sub>TCF and (C) E<sub>RO</sub>TCF; the insets showing the corresponding EDS mapping images.

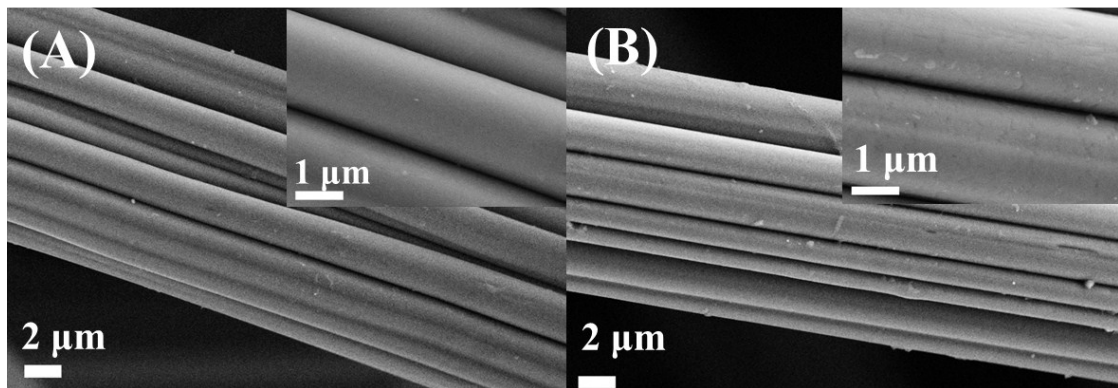

**Figure S3** SEM images of (A) CF and (B) TE<sub>0</sub>TCF, the inset shows the high magnification morphology of the corresponding samples.
